# Supplementary material for: Association between childhood adversity and a diagnosis of personality disorder in young adulthood: a cohort study of 107,287 individuals in Stockholm County
Source: Springer Nature journal article supplement (doi:10.1007/s10654-017-0264-9), 2017-05-30

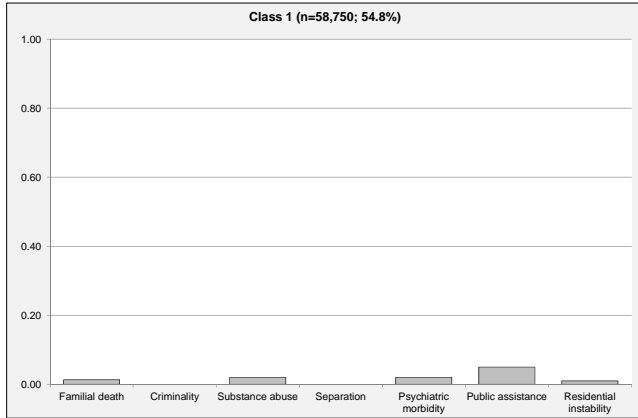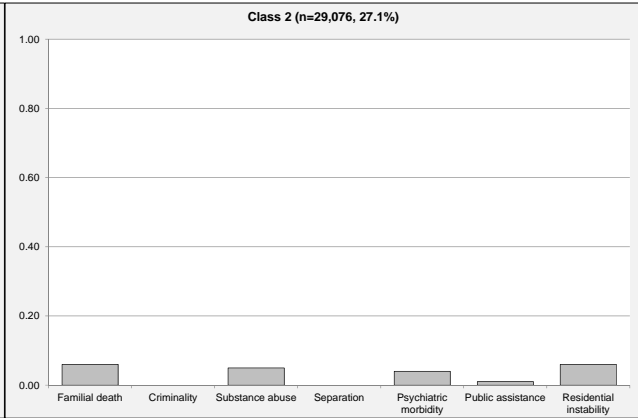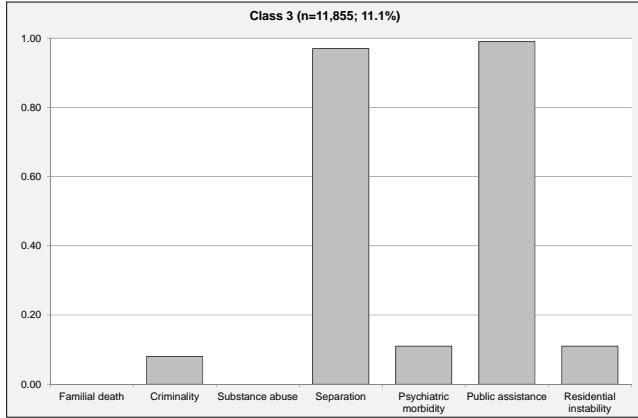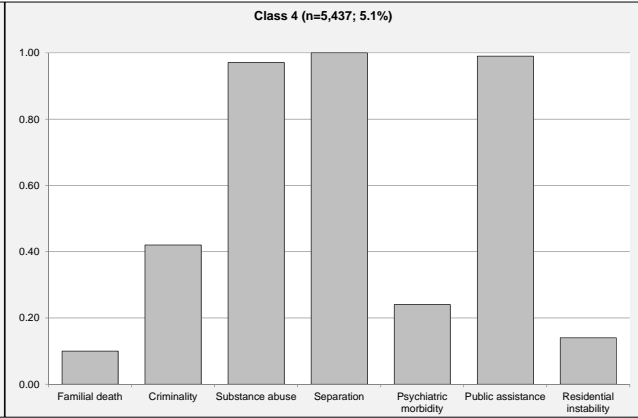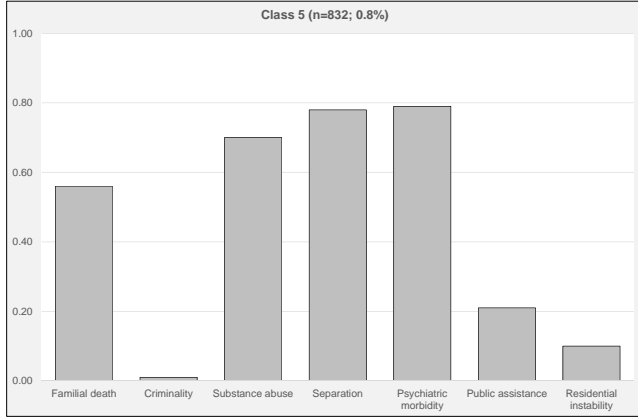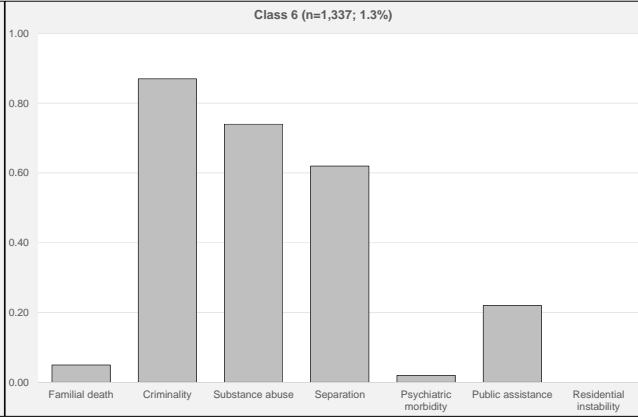

Supplement: MOESM3 [file 12322820]
